# Supplementary material for: Highly improved aqueous Zn‖LiMn2O4 hybrid-ion batteries using poly(ethylene glycol) and manganese sulfate as electrolyte additives
Source: Royal Society of Chemistry journal article supplement (doi:10.1039/d3se01295f), 2024-01-01
Supplement: d3se01295f1.pdf [file d3se01295f1.pdf]

## Supporting Information

# Highly Improved Aqueous Zn||LiMn<sub>2</sub>O<sub>4</sub> Hybrid-ion Battery Using Poly(ethylene glycol) and Manganese Sulfate as Electrolyte Additives

Jingyi Kong<sup>1</sup>, Hanling Guo<sup>1</sup>, Yuan Li<sup>1</sup>, Min Gong<sup>1</sup>, Xiang Lin<sup>1</sup>, Liang Zhang<sup>1</sup>, Dongrui Wang<sup>\*1,2</sup>

<sup>1</sup> Department of Chemistry and Chemical Engineering, School of Chemistry and Biological Engineering, University of Science and Technology Beijing, Beijing 100083, China

<sup>2</sup> Beijing Key Laboratory for Bioengineering and Sensing Technology, University of Science and Technology Beijing, Beijing 100083, China

\*Corresponding author, [wangdr@ustb.edu.cn](mailto:wangdr@ustb.edu.cn)

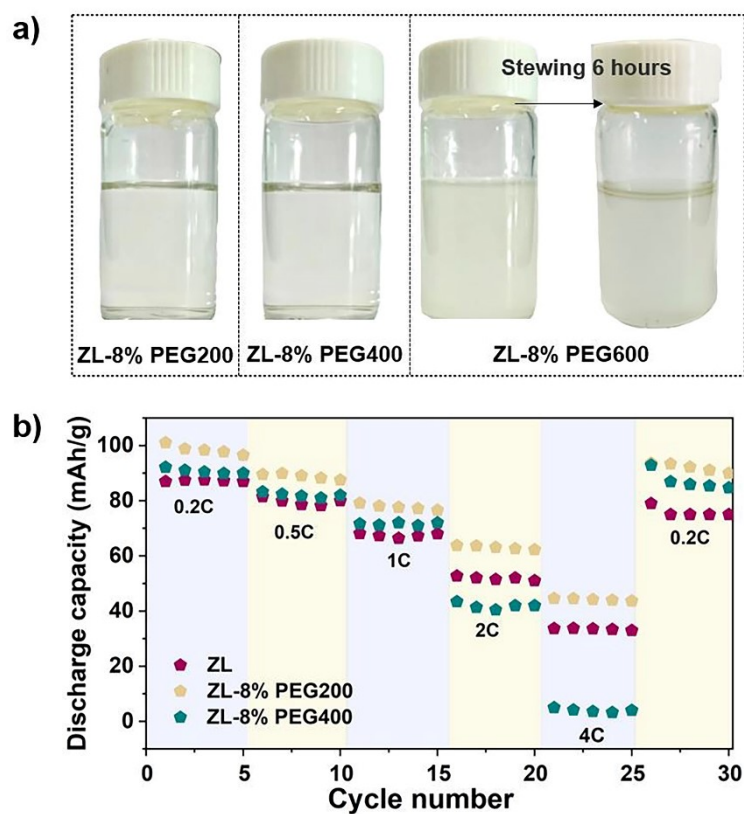

**Figure S1.** (a) Digital photographs of various electrolytes. (b) Rate performance of Zn||LMO cells using ZL, ZL-8% PEG200, and ZL-8% PEG400 as the electrolyte.

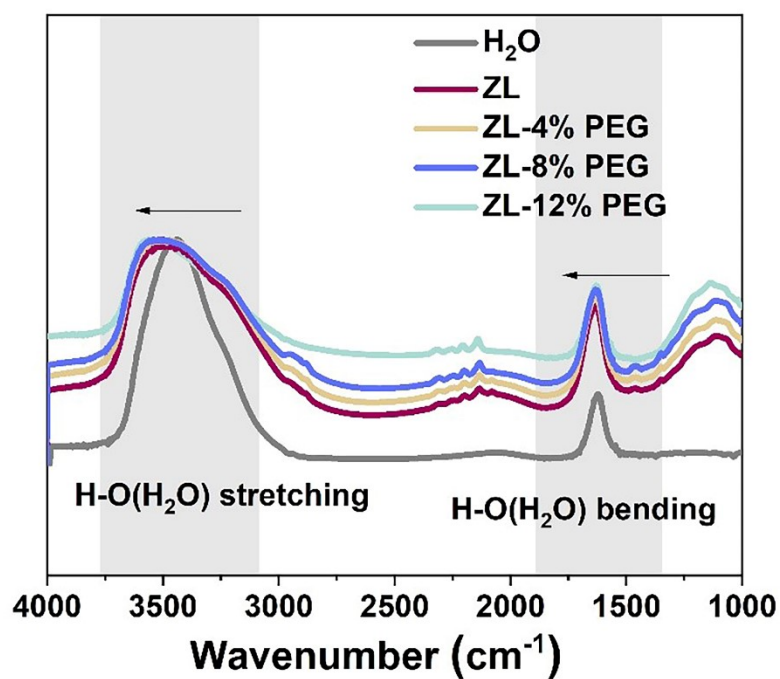

**Figure S2.** Normalized FTIR spectra of various electrolytes and H<sub>2</sub>O.

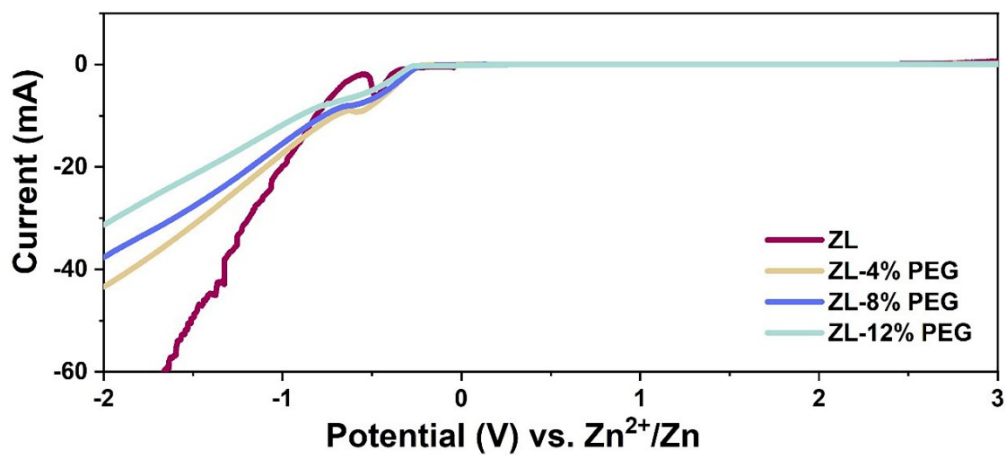

**Figure S3.** Linear sweep voltammetry (LSV) curves of Ti foils by using ZL electrolyte with/without the PEG additive at 10 mV/s.

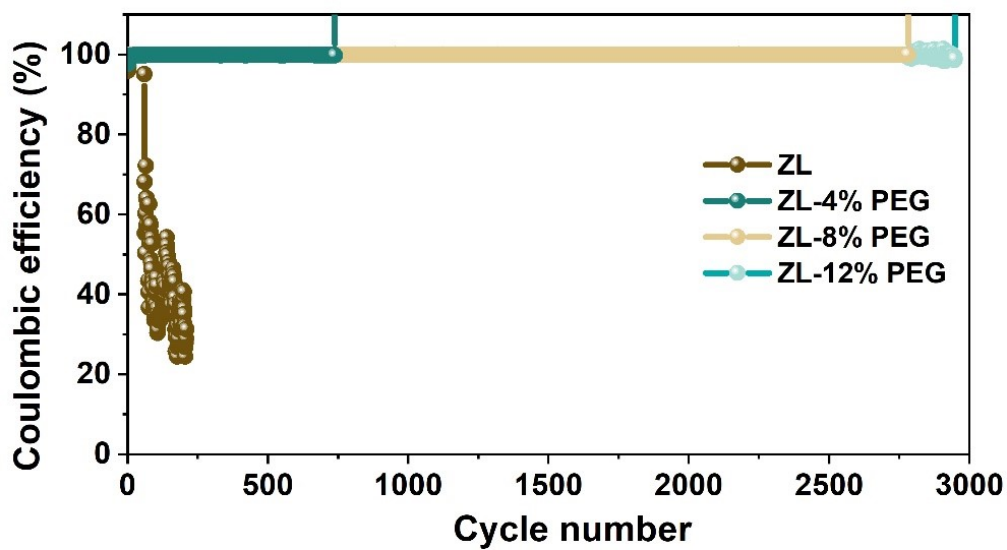

**Figure S4.** Coulombic efficiency of Cu||Zn asymmetric cells using various electrolytes cycled at 2 mA/cm<sup>2</sup> and 1 mAh/cm<sup>2</sup>.

**Table S1.** A survey of cyclic performance of Zn||Zn symmetric cells containing PEG under galvanostatic plating/stripping.

| Electrodes | Electrolyte                                                                                           | Current density<br>(mA/cm <sup>2</sup> ) | Plated Zn per cycle<br>(mAh/cm <sup>2</sup> ) | Life<br>cycle | Ref.         |
|------------|-------------------------------------------------------------------------------------------------------|------------------------------------------|-----------------------------------------------|---------------|--------------|
| Zn  Zn     | ZL-8% PEG-0.1 Mn                                                                                      | 2                                        | 1                                             | 1000          | This<br>work |
|            |                                                                                                       | 1                                        | 1                                             |               |              |
| Zn  Zn     | 3 M LiCl+ 4 M ZnCl <sub>2</sub>                                                                       | -                                        | -                                             | -             | <b>1</b>     |
| Zn  Zn     | 1 M ZnSO <sub>4</sub> ·7H <sub>2</sub> O + 2 M Li <sub>2</sub> SO <sub>4</sub> +<br>4% FS + 1% PEG200 | -                                        | -                                             | -             | <b>2</b>     |
| Zn  Zn     | 1 m Zn(ClO <sub>4</sub> ) <sub>2</sub> + 10 m LiClO <sub>4</sub> +<br>10% PVA                         | -                                        | -                                             | -             | <b>3</b>     |
| Zn  Zn     | 2 M ZnSO <sub>4</sub> ·7H <sub>2</sub> O + 1 M Li <sub>2</sub> SO <sub>4</sub> +<br>4% FS + 1% PEG300 | -                                        | -                                             | -             | <b>4</b>     |
| Zn  Zn     | 1 M ZnSO <sub>4</sub> ·7H <sub>2</sub> O + 10 000 ppm<br>PEG200 + 50 ppm BDA.                         | 0.5                                      | 1                                             | 890           | <b>5</b>     |
| Zn  Zn     | 1 M Zn(OTf) <sub>2</sub> + 30% H <sub>2</sub> O + 70%<br>PEG                                          | 2                                        | 1                                             | 8000          | <b>6</b>     |
|            |                                                                                                       | 1                                        | 1                                             | 9000          |              |
| Zn  Zn     | 2 M Zn(OTf) <sub>2</sub> + 50% H <sub>2</sub> O + 50%<br>PEG                                          | 1                                        | 1                                             | 1000          | <b>7</b>     |

ZL: 1 m ZnSO<sub>4</sub>·7H<sub>2</sub>O + 2 m Li<sub>2</sub>SO<sub>4</sub>;

Mn: MnSO<sub>4</sub>·H<sub>2</sub>O;

ppm: 1 ppm=1 mg/kg;

BDA: benzylidene acetone;

FS: Fumed silica with a particle size of ~7 nm;

PVA: Polyvinyl alcohol.

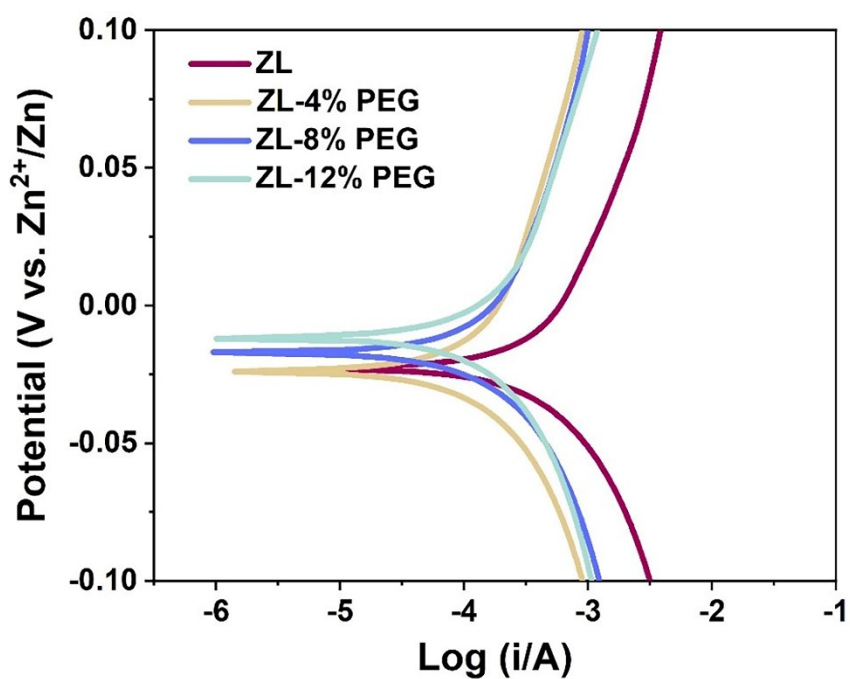

Figure S5. Tafel plots of Zn electrodes in various electrolytes at a scan rate of 10 mV/s.

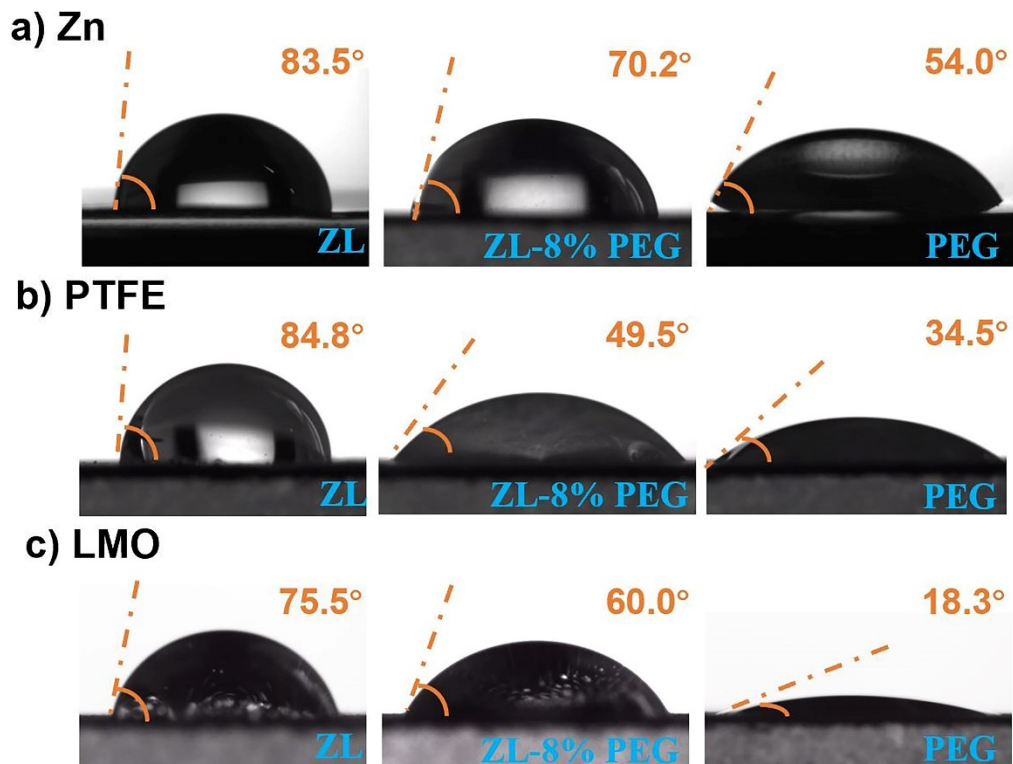

Figure S6. Contact angles of liquids on (a) Zn anodes, (b) PTFE separators, and (c) LMO cathodes.

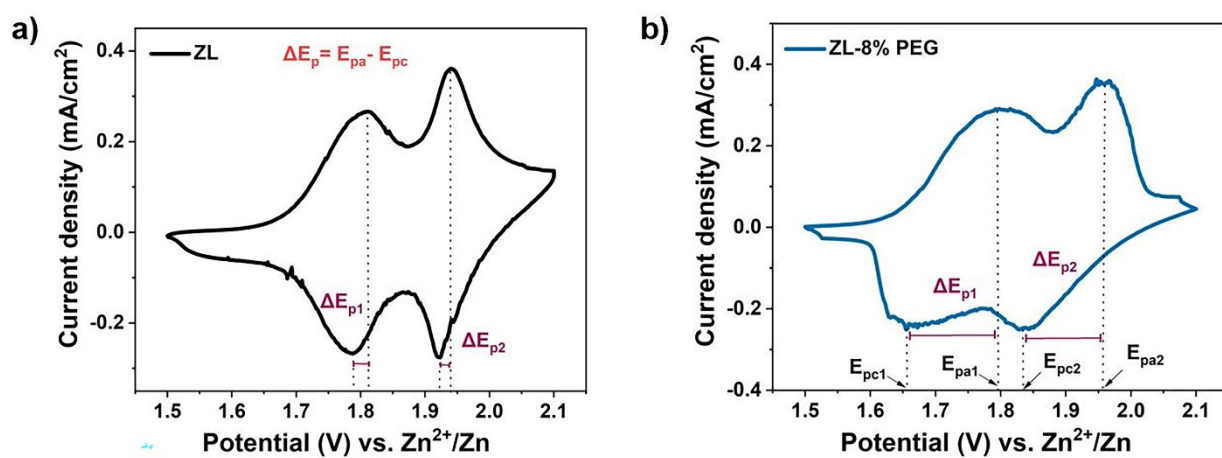

**Figure S7.** Cyclic voltammograms of LMO cathode in (a) ZL and (b) ZL-8% PEG at a scan rate of 0.1 mV/s.

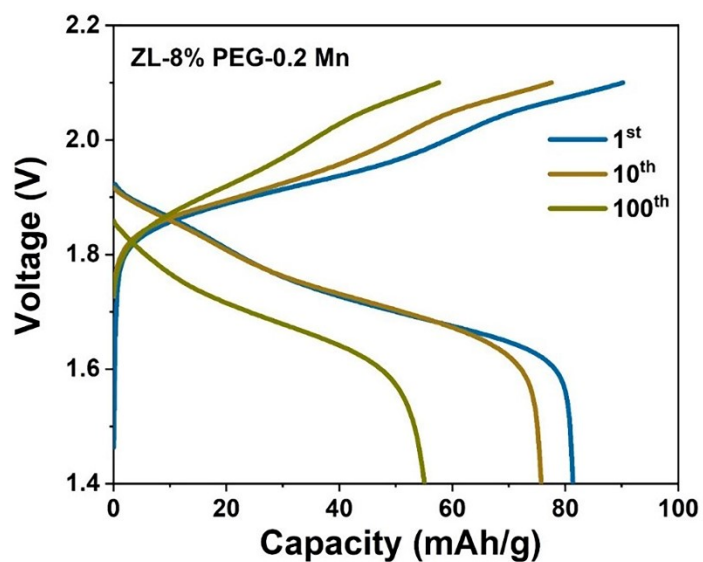

**Figure S8.** GCD profiles of Zn||LMO full cell under 1 C at 1<sup>st</sup>, 10<sup>th</sup>, 100<sup>th</sup> cycle in ZL-8% PEG-0.2 Mn.

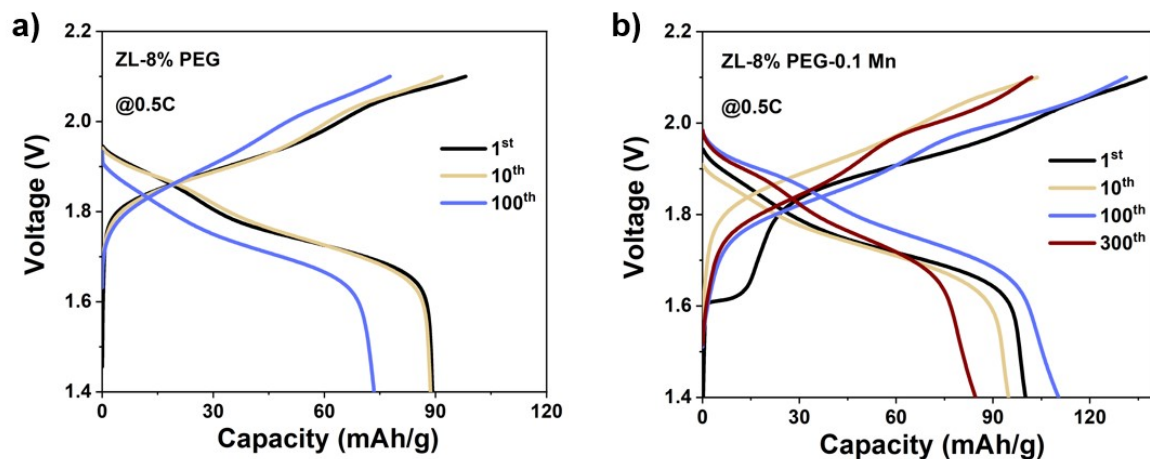

**Figure S9.** GCD profiles of Zn||LMO full cells under 0.5 C at different cycles using (a) ZL-8% PEG and (b) ZL-8% PEG-0.1 Mn as the electrolyte, respectively.

**Table S2.** Comparison of cyclic performance of Zn||LMO full cells under different charging/discharging rates.

| Cathode/Total mass,<br>mg/cm <sup>2</sup> | Anode   | electrolyte                                                                                          | Voltage/V         | Rate  | Capacity retention (%<br>@number of cycles) | Total<br>lifespan/h | Ref.         |
|-------------------------------------------|---------|------------------------------------------------------------------------------------------------------|-------------------|-------|---------------------------------------------|---------------------|--------------|
| LMO/KB/PVDF<br>3.0                        | Zn foil | ZL-8% PEG-0.1 Mn                                                                                     | 1.80              | 2 C   | 50% @500 cycles                             | 250                 | This<br>work |
|                                           |         |                                                                                                      |                   | 0.5 C | 85% @300 cycles                             | 600                 |              |
| LMO/AB/PVDF<br>2.4                        | Zn foil | 3 M LiCl-4 M ZnCl <sub>2</sub>                                                                       | 1.75 <sup>a</sup> | 4 C   | 90% @1000 cycles                            | 250                 | 1            |
| LMO/KS-6/PVDF<br>5.3                      | Zn foil | 1 M ZnSO <sub>4</sub> ·7H <sub>2</sub> O<br>-2 M Li <sub>2</sub> SO <sub>4</sub> -4% FS-1%<br>PEG200 | 1.80 <sup>a</sup> | 4 C   | 80.2% @1000 cycle                           | 250                 | 2            |
| LMO/SP/PTFE<br>5~6                        | Zn foil | 1 m Zn(ClO <sub>4</sub> ) <sub>2</sub> -10 m<br>LiClO <sub>4</sub> -10% PVA                          | 1.65 <sup>a</sup> | 1 C   | 75.0% @300 cycles                           | 300                 | 3            |
| LMO/KS-6/PVDF<br>4~6                      | Zn foil | 2 M ZnSO <sub>4</sub> ·7H <sub>2</sub> O<br>-1 M Li <sub>2</sub> SO <sub>4</sub> -4% FS-1%<br>PEG300 | 1.80 <sup>a</sup> | 1 C   | 75.0% @300 cycles                           | 300                 | 4            |

<sup>a</sup> Estimated value

ZL: 1 m ZnSO<sub>4</sub>·7H<sub>2</sub>O + 2 m Li<sub>2</sub>SO<sub>4</sub>

LMO: LiMn<sub>2</sub>O<sub>4</sub>

KB: Ketjenblack  
 AB: Acetyleneblack  
 PVDF: polyvinylidene fluoride  
 KS-6: A high-purity natural graphite  
 PG: Porous graphene  
 FS: Fumed silica with a particle size of ~7 nm

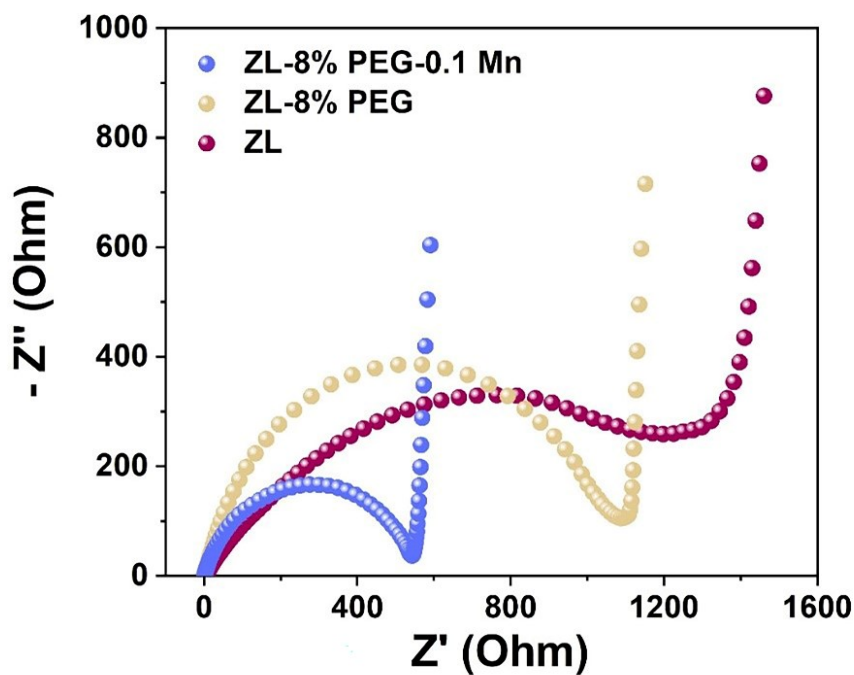

**Figure S10.** Nyquist plots of pristine Zn||LMO cells in ZL, ZL-8% PEG and ZL-8% PEG-0.1 Mn electrolytes, respectively.

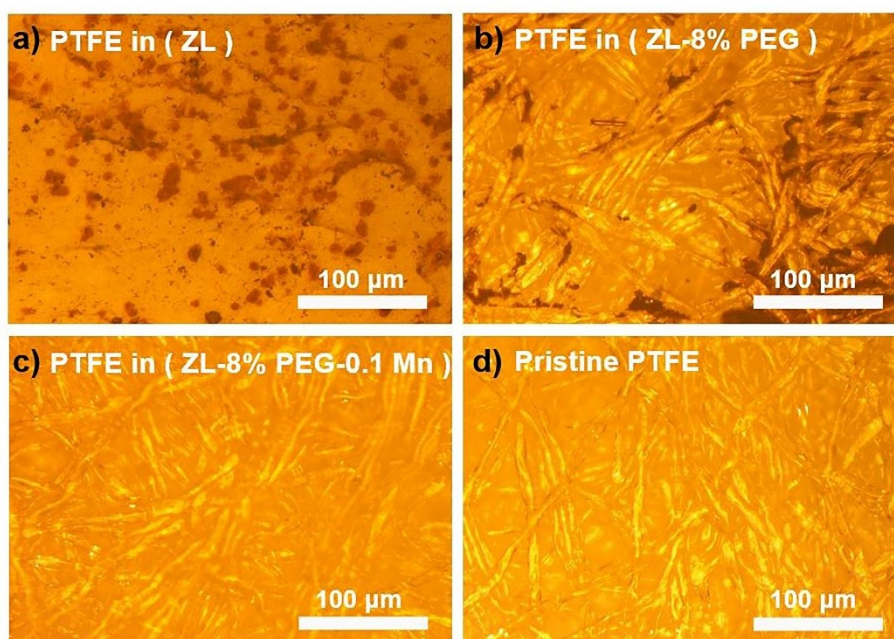

**Figure S11.** Optical microscope images of surfaces of PTFE separators in Zn||LMO full cells with different electrolytes (a-c) after 100 cycles of GCD tests under 2C. (d) The surface of a fresh PTFE



separator.

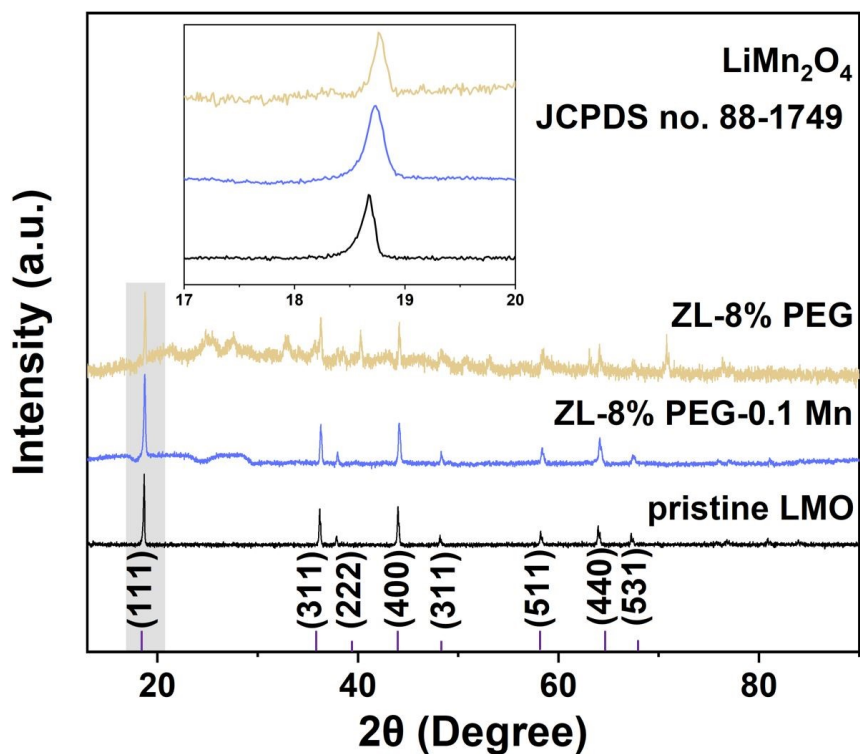

**Figure S12.** Ex-situ XRD patterns of LMO before and after 100 cycles of GCD tests in Zn||LMO full cells using ZL-8% PEG and ZL-8% PEG-0.1 Mn electrolytes.

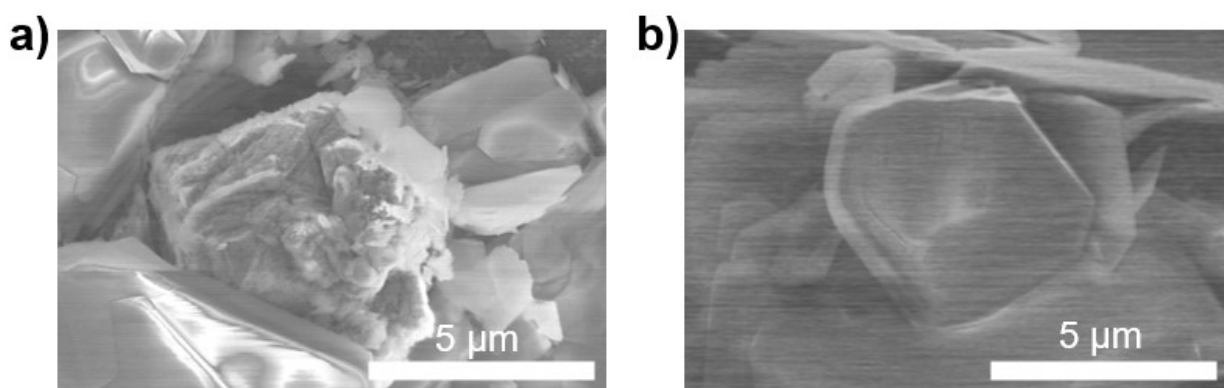

**Figure S13.** Typical SEM images of LMO after 100 cycles of GCD tests in Zn||LMO full cells using (a) ZL-8% PEG and (b) ZL-8% PEG-0.1 Mn electrolytes.

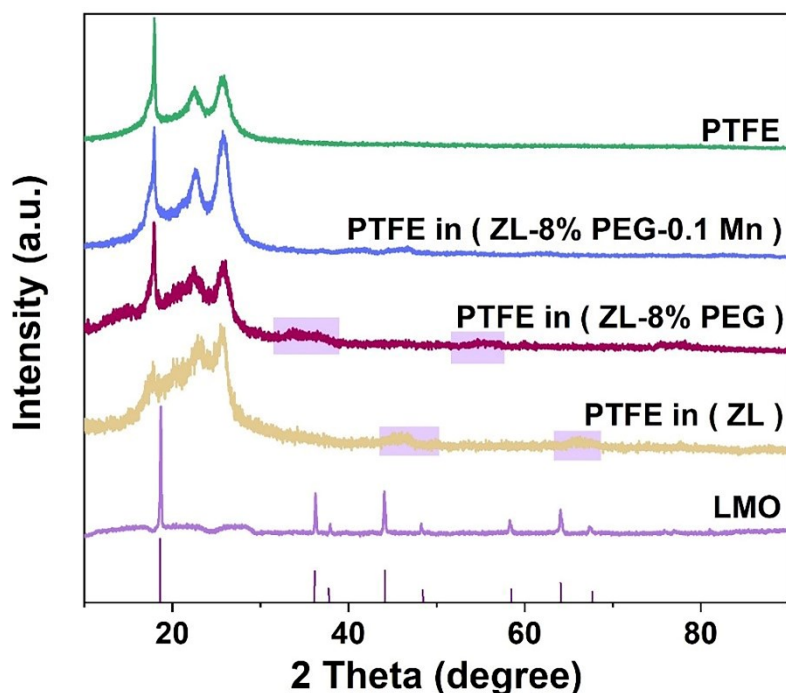

**Figure S14.** XRD patterns of PTFE separators in Zn||LMO full cells using various electrolytes after 100 cycles GCD tests. XRD patterns of pristine PTFE separator and LMO powders are also listed as comparison.

## References

1. J. Yan, J. Wang, H. Liu, Z. Bakenov, D. Gosselink and P. Chen, *J. Power Sources.*, 2012, **216**, 222-226.
2. W. Xiong, T. K. A. Hoang, D. Yang, Y. Liu, M. Ahmed, J. Xu, X. Qiu and P. Chen, *J. Energy Storage.*, 2019, **26**, 100920.
3. S. Chen, R. Lan, J. Humphreys and S. Tao, *ACS Appl. Energy Mater.*, 2020, **3**, 2526-2536.
4. A. Mitha, H. Mi, W. Dong, I. S. Cho, J. Ly, S. Yoo, S. Bang, T. K. A. Hoang and P. Chen, *J. Electroanal. Chem.*, 2019, **836**, 1-6.
5. G. Lin, X. Zhou, L. Liu, D. Huang, H. Li, X. Cui and J. Liu, *RSC Adv*, 2022, **12**, 25054-25059.
6. Y. Wu, Z. Zhu, D. Shen, L. Chen, T. Song, T. Kang, Z. Tong, Y. Tang, H. Wang and C.S. Lee, *Energy Storage Mater.*, 2022, **45**, 1084-1091.
7. J. Zhou, H. Yuan, J. Li, W. Wei, Y. Li, J. Wang, L. Cheng, D. Zhang, Y. Ding, D. Chen and H. Wang, *Chem. Eng. J.*, 2022, **442**, 136218.
